# Supplementary material for: In Vivo and In Vitro Pro-Fibrotic Response of Lung-Resident Mesenchymal Stem Cells from Patients with Idiopathic Pulmonary Fibrosis
Source: MDPI journal article supplement (doi:10.3390/cells13020160), 2024-01-16
Supplement: s1 [file s1]

Table S1: Primer sequences.

| Gene          | Organism            | Forward primer              | Reverse primer           |
|---------------|---------------------|-----------------------------|--------------------------|
| <i>Col1a1</i> | <i>Mus musculus</i> | CCAAGAAGACATCCCTGAAGTCA     | TGCACGTCATCGCACACA       |
| <i>Fn1</i>    | <i>Mus musculus</i> | GGTGTACAACTTCCAATTACG       | GGAATTTCCGCCTCGAGTCT     |
| <i>Il6</i>    | <i>Mus musculus</i> | ACTTCACAAGTCCGGAGAGG        | TGCCATTGCACAACTCTTTTC    |
| <i>Tnfa</i>   | <i>Mus musculus</i> | CGGTCCCCAAAGGGATGAGAAGT     | ATGATCTGAGTGTGAGGGTCTGGG |
| <i>Mcp1</i>   | <i>Mus musculus</i> | CCAGCCTACTCATTGGGATCA       | CTTCTGGGCCTGCTGTTCA      |
| <i>Hprt</i>   | <i>Mus musculus</i> | CCTAAGATGAGCGCAAGTTGAA      | CCACAGGACTAGAACACCTGCTAA |
| <i>Gapdh</i>  | <i>Mus musculus</i> | GAGCCCTTCCACAATGCCAAAGTT    | TGTGATGGGTGTGAACCACGAGAA |
| <i>TGFA</i>   | <i>Homo sapiens</i> | CTGCTGTGGCTACTGGTGC         | CTTCACCAGCTCCATGTCCAT    |
| <i>ACTA2</i>  | <i>Homo sapiens</i> | AGAGCTACATAACACAGTTTCTCCTGA | CGAGATCTCACTGACTACCTCATG |
| <i>COL1A1</i> | <i>Homo sapiens</i> | CAAGAGGAAGGCCAAGTCGAC       | TTGTCGCAGACGCAGCAGATCC   |
| <i>FN1</i>    | <i>Homo sapiens</i> | GGATGTGTGGCAGATAGGATGTATT   | CAATGCGGTACATGACCCCT     |
| <i>TNC</i>    | <i>Homo sapiens</i> | TCGGTAGCCATCCAGGAGAG        | CCATCTATGGCGTGATCCGG     |
| <i>B2M</i>    | <i>Homo sapiens</i> | ATATTCAAACCTCCATGATGC       | ACCCCCACTGAAAAAGATGAG    |

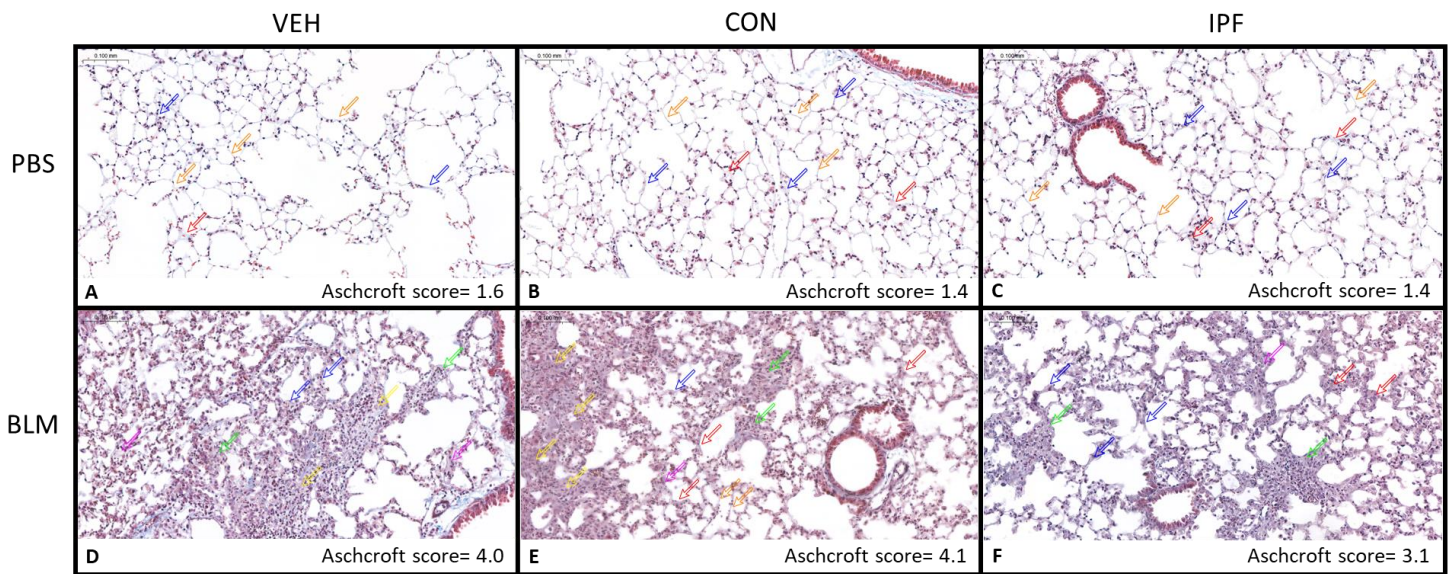

Figure S1. Histological evaluation of lung damage. Representative images of Masson's trichrome staining of one representative sample for each experimental group (PBS+VEH, PBS+CON, PBS+IPF, BLM+VEH, BLM+CON, BLM+IPF). Images were obtained at 20 $\times$ . The mean Ashcroft score assessed by the modified Ashcroft scale of the selected samples is indicated. Coloured arrows indicate the grade of fibrosis in the selected field: orange, grade 0; blue, grade 1; red, grade 2; pink, grade 3; green, grade 4; yellow, grade 5. BLM: bleomycin, PBS: phosphate-buffered saline, VEH: vehicle, CON: control, IPF: idiopathic pulmonary fibrosis.

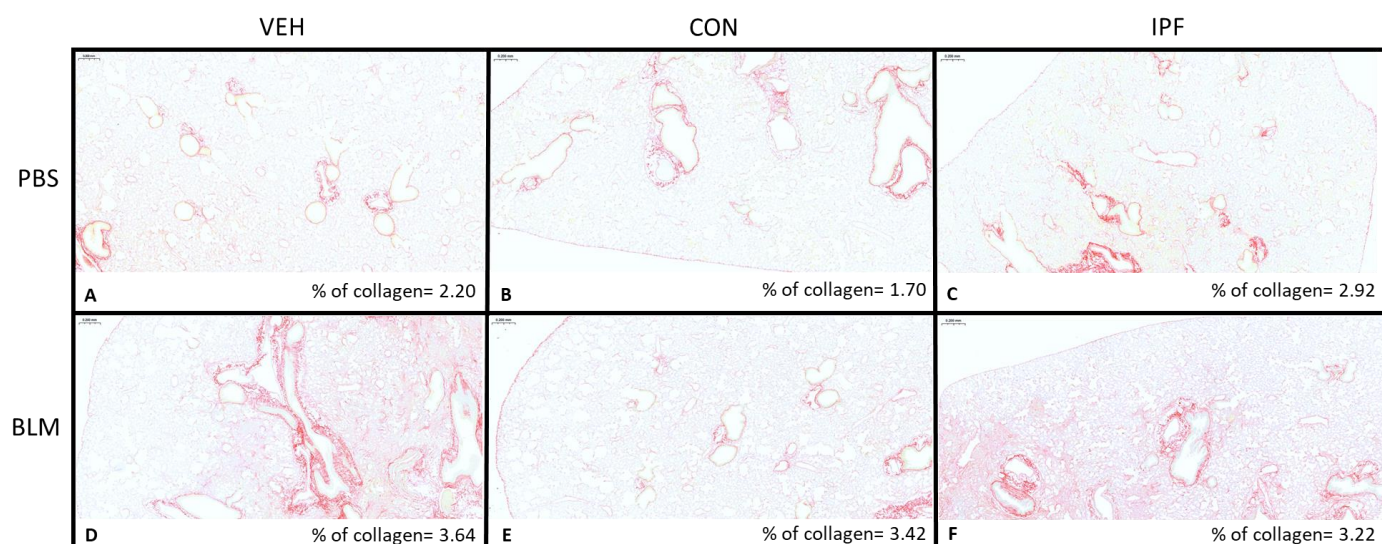

Figure S2. Histological assessment of lung collagen content. Representative images of Pricosirious Red staining of one representative sample for each experimental group (PBS+VEH, PBS+CON, PBS+IPF, BLM+VEH, BLM+CON, BLM+IPF). Images were obtained at 5x. The amount of collagen of the selected samples is indicated. Collagen quantification was expressed relative to the total lung area. BLM: bleomycin, PBS: phosphate-buffered saline, VEH: vehicle, CON: control, IPF: idiopathic pulmonary fibrosis.
